# Supplementary material for: Turn-on and blue-shift fluorescence sensor toward l-histidine based on stable CdII metal–organic framework with tetranuclear cluster units
Source: Royal Society of Chemistry journal article supplement (doi:10.1039/d2dt00390b), 2022-01-01
Supplement: d2dt00390b1.pdf [file d2dt00390b1.pdf]

## *Electronic Supplementary Information (ESI)*

### **Turn-on and blue-shift fluorescence sensor toward L-histidine based on stable Cd<sup>II</sup> metal-organic framework with tetranuclear cluster units**

**Jing Li,<sup>a</sup> Shu-Li Yao,<sup>a</sup> Teng-Fei Zheng,<sup>a\*</sup> Hui Xu,<sup>a</sup> Jin-Yan Li,<sup>b</sup> Yan Peng,<sup>a</sup> Jing-Lin Chen,<sup>a</sup> Sui-Jun Liu<sup>a\*</sup> and He-Rui Wen<sup>a</sup>**

<sup>a</sup>School of Chemistry and Chemical Engineering, Jiangxi University of Science and Technology, Ganzhou 341000, Jiangxi Province, P.R. China.

<sup>b</sup>School of Chemical and Environmental Engineering, Hanshan Normal University, Chaozhou 521041, Guangdong Province, P.R. China.

\*Corresponding authors. E-mail: sjliu@jxust.edu.cn (S.-J. Liu), zhengtengfei0628@163.com (T.-F. Zheng). Tel: +86-797-8312204.

**Table S1.** Selected bond lengths (Å) and angles (°) for **JXUST-14**.<sup>a</sup>

|                                         |            |                                         |            |
|-----------------------------------------|------------|-----------------------------------------|------------|
| Cd1—O1                                  | 2.4954(18) | Cd1—O2                                  | 2.2766(19) |
| Cd1—O4 <sup>#1</sup>                    | 2.2914(18) | Cd1—O4 <sup>#2</sup>                    | 2.4338(18) |
| Cd1—N7 <sup>#3</sup>                    | 2.389(2)   | Cd1—O7 <sup>#4</sup>                    | 2.5287(19) |
| Cd1—O8 <sup>#4</sup>                    | 2.3209(19) | O1—Cd2 <sup>#1</sup>                    | 2.3097(19) |
| Cd2—O1 <sup>#5</sup>                    | 2.3097(19) | Cd2—O5                                  | 2.2645(19) |
| Cd2—O3                                  | 2.2664(18) | Cd2—O6                                  | 2.471(2)   |
| Cd2—N6                                  | 2.356(2)   | Cd2—O7 <sup>#6</sup>                    | 2.3302(18) |
| O4—Cd1 <sup>#5</sup>                    | 2.2914(18) | O4—Cd1 <sup>#2</sup>                    | 2.4338(17) |
| N7—Cd1 <sup>#3</sup>                    | 2.389(2)   | O7—Cd1 <sup>#7</sup>                    | 2.5287(19) |
| O7—Cd2 <sup>#6</sup>                    | 2.3302(18) | O8—Cd1 <sup>#7</sup>                    | 2.3209(19) |
| O1—Cd1—O7 <sup>#4</sup>                 | 165.02(6)  | O2—Cd1—O1                               | 54.47(6)   |
| O2—Cd1—O4 <sup>#1</sup>                 | 127.42(6)  | O2—Cd1—O4 <sup>#2</sup>                 | 81.52(7)   |
| O2—Cd1—N7 <sup>#3</sup>                 | 102.77(8)  | O2—Cd1—O7 <sup>#4</sup>                 | 130.77(7)  |
| O2—Cd1—O8 <sup>#4</sup>                 | 89.10(7)   | O4 <sup>#1</sup> —Cd1—O1                | 78.08(6)   |
| O4 <sup>#2</sup> —Cd1—O1                | 85.57(6)   | O4 <sup>#1</sup> —Cd1—O4 <sup>#2</sup>  | 72.78(7)   |
| O4 <sup>#1</sup> —Cd1—N7 <sup>#3</sup>  | 97.67(7)   | O4 <sup>#2</sup> —Cd1—O7 <sup>#4</sup>  | 81.87(6)   |
| O4 <sup>#1</sup> —Cd1—O7 <sup>#4</sup>  | 90.37(6)   | O4 <sup>#1</sup> —Cd1—O8 <sup>#4</sup>  | 142.21(7)  |
| N7 <sup>#3</sup> —Cd1—O1                | 89.64(7)   | N7 <sup>#3</sup> —Cd1—O4 <sup>#2</sup>  | 170.02(7)  |
| N7 <sup>#3</sup> —Cd1—O7 <sup>#4</sup>  | 101.45(7)  | O8 <sup>#4</sup> —Cd1—O1                | 139.29(7)  |
| O8 <sup>#4</sup> —Cd1—O4 <sup>#2</sup>  | 108.51(7)  | O8 <sup>#4</sup> —Cd1—N7 <sup>#3</sup>  | 80.74(8)   |
| O8 <sup>#4</sup> —Cd1—O7 <sup>#4</sup>  | 53.73(7)   | Cd2 <sup>#1</sup> —O1—Cd1               | 112.87(7)  |
| O1 <sup>#5</sup> —Cd2—O6                | 155.91(7)  | O1 <sup>#5</sup> —Cd2—N6                | 84.38(8)   |
| O1 <sup>#5</sup> —Cd2—O7 <sup>#6</sup>  | 85.61(7)   | O1 <sup>#5</sup> —Cd2—C21               | 129.20(8)  |
| O5—Cd2—O1 <sup>#5</sup>                 | 102.65(7)  | O5—Cd2—O3                               | 143.39(7)  |
| O5—Cd2—O6                               | 54.99(7)   | O5—Cd2—N6                               | 86.72(8)   |
| O5—Cd2—O7 <sup>#6</sup>                 | 95.23(7)   | O5—Cd2—C21                              | 27.88(8)   |
| O3—Cd2—O1 <sup>#5</sup>                 | 112.20(7)  | O3—Cd2—O6                               | 91.64(7)   |
| O3—Cd2—N6                               | 85.87(8)   | O3—Cd2—O7 <sup>#6</sup>                 | 98.18(7)   |
| N6—Cd2—O6                               | 101.43(8)  | O7 <sup>#4</sup> —Cd2—O6                | 87.66(7)   |
| O7 <sup>#6</sup> —Cd2—N6                | 169.99(8)  | Cd1 <sup>#5</sup> —O4—Cd1 <sup>#2</sup> | 107.22(7)  |
| Cd2 <sup>#6</sup> —O7—Cd1 <sup>#7</sup> | 108.24(7)  |                                         |            |

<sup>a</sup>Symmetry codes: #1:  $x, y, z-1$ ; #2:  $-x+1, -y, -z$ ; #3:  $-x+2, -y+1, -z$ ; #4:  $x+1, y-1, z-2$ ; #5:  $x, y, z+1$ ;

#6:  $-x, -y+1, -z+2$ ; #7:  $x-1, y+1, z+2$ .

**Table S2.** SHAPE analysis of Cd<sup>II</sup> ions in JXUST-14.

| <b>Ions</b> | <b>Label</b> | <b>Shape</b>                            | <b>Symmetry</b> | <b>Distortion(<math>\tau</math>)</b> |
|-------------|--------------|-----------------------------------------|-----------------|--------------------------------------|
| <b>Cd1</b>  | HP-7         | Heptagon                                | $D_{7h}$        | 29.730                               |
|             | HPY-7        | Hexagonal pyramid                       | $C_{6v}$        | 18.659                               |
|             | PBPY-7       | Pentagonal bipyramid                    | $D_{5h}$        | 4.213                                |
|             | COC-7        | Capped octahedron                       | $C_{3v}$        | 4.714                                |
|             | CTPR-7       | Capped trigonal prism                   | $C_{2v}$        | <b>4.067</b>                         |
|             | JPBPY-7      | Johnson pentagonal bipyramid J13        | $D_{5h}$        | 8.205                                |
|             | JETPY-7      | Johnson elongated triangular pyramid J7 | $C_{3v}$        | 20.238                               |
| <b>Cd2</b>  | HP-6         | Hexagon                                 | $D_{6h}$        | 32.417                               |
|             | PPY-6        | Pentagonal pyramid                      | $C_{5v}$        | 17.674                               |
|             | OC-6         | Octahedron                              | $O_h$           | <b>4.538</b>                         |
|             | TPR-6        | Trigonal prism                          | $D_{3h}$        | 8.940                                |
|             | JPPY-6       | Johnson pentagonal pyramid J2           | $C_{5v}$        | 21.930                               |

**Table S3.** HOMO and LUMO energies for H<sub>2</sub>BTDB and histidine.

|                          | <b>HOMO</b>  | <b>LUMO</b>  |
|--------------------------|--------------|--------------|
| <b>H<sub>2</sub>BTDB</b> | -0.220081 ev | -0.175782 ev |
| <b>histidine</b>         | -0.180861 ev | -0.105947 ev |

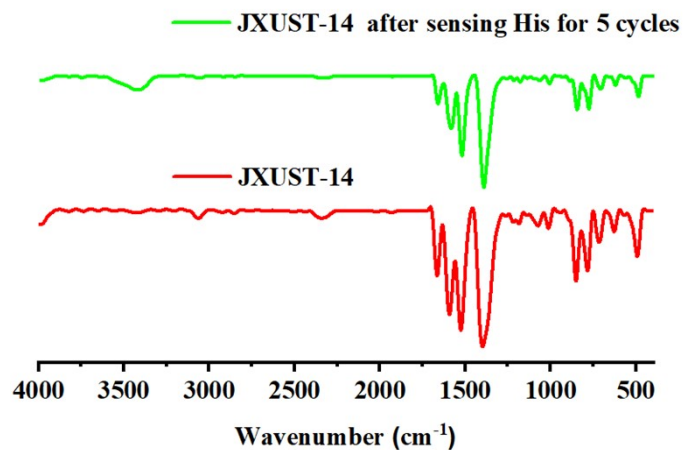

**Fig. S1** IR spectra of JXUST-14 and JXUST-14 after sensing His for 5 cycles at room temperature.

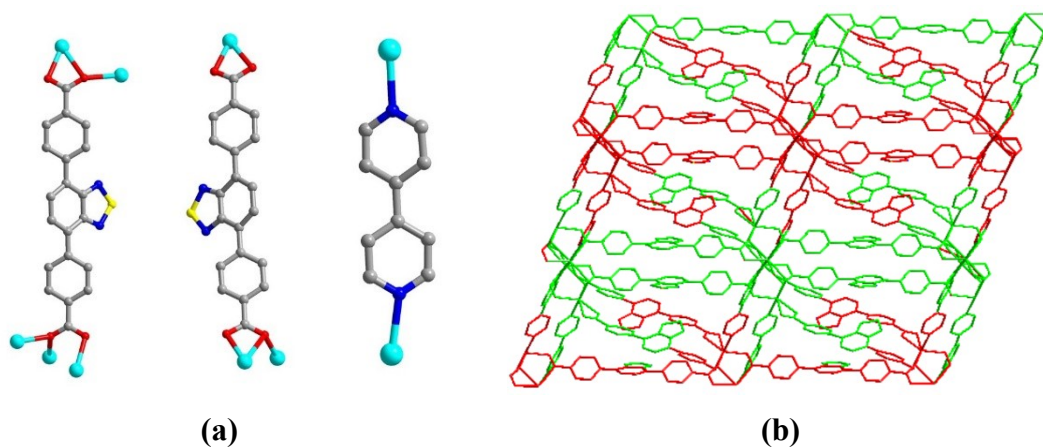

**Fig. S2** (a) View of the coordination modes of BTDB<sup>2-</sup> and 4,4-bpy in JXUST-14; (b) the two-fold interpenetrated structure of JXUST-14.

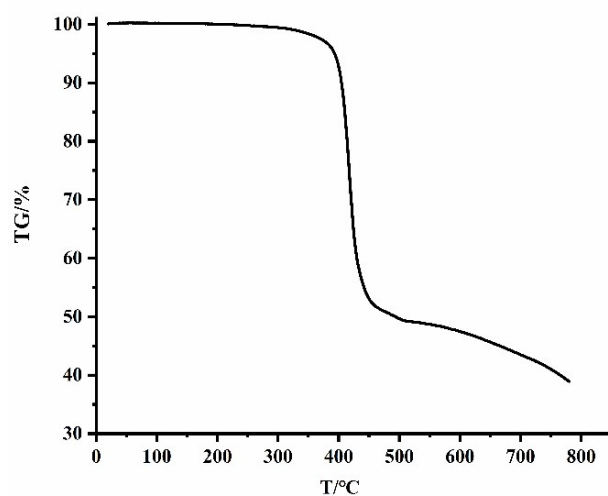

**Fig. S3** The TGA curve for JXUST-14 under N<sub>2</sub> atmosphere.

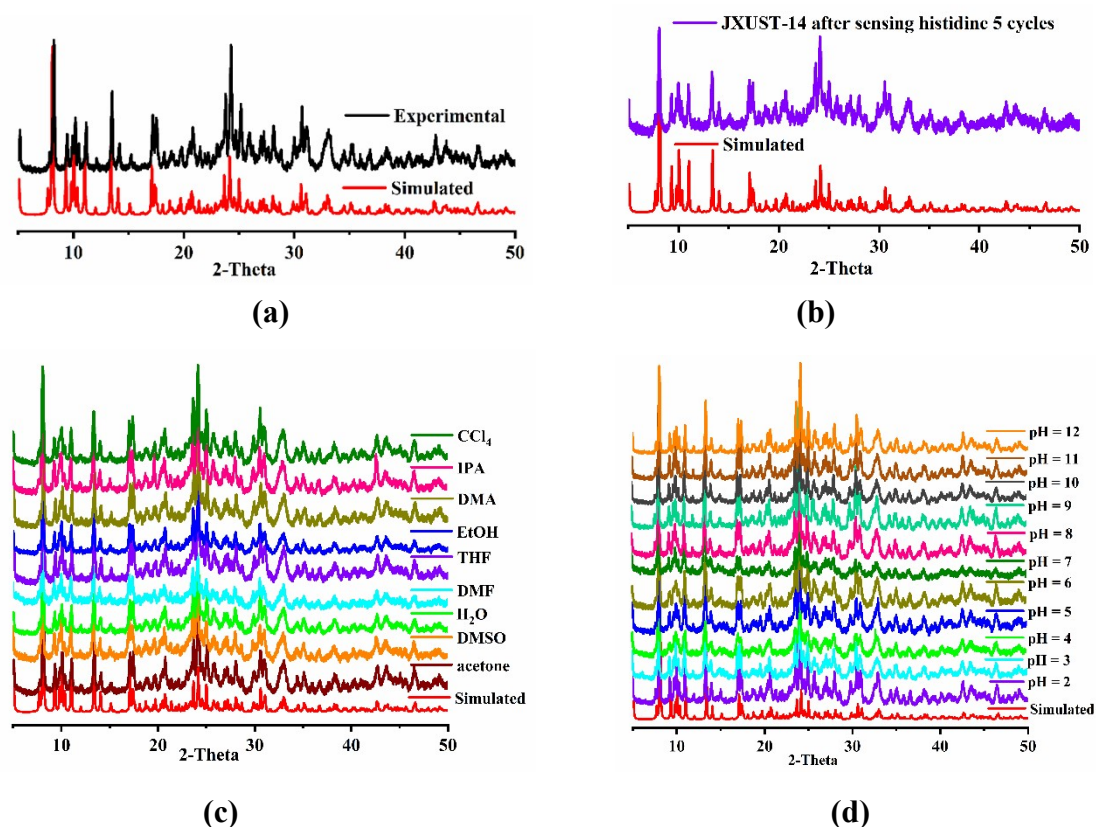

**Fig. S4** (a) The simulated and experimental PXRD patterns of **JXUST-14**; (b) The simulated and experimental PXRD patterns of **JXUST-14** after sensing histidine for 5 cycles; (c) The simulated and experimental PXRD patterns of **JXUST-14** after immersing in common organic solvents for 48 h; (d) The simulated and experimental PXRD patterns of **JXUST-14** immersed in aqueous solution with diverse pH for 48 h.

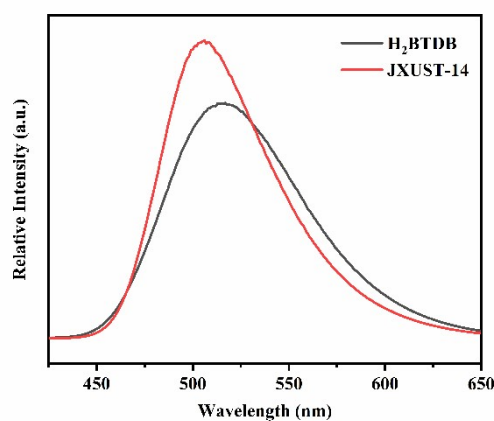

**Fig. S5** Solid-state emission spectra of H<sub>2</sub>BTDB and **JXUST-14**.

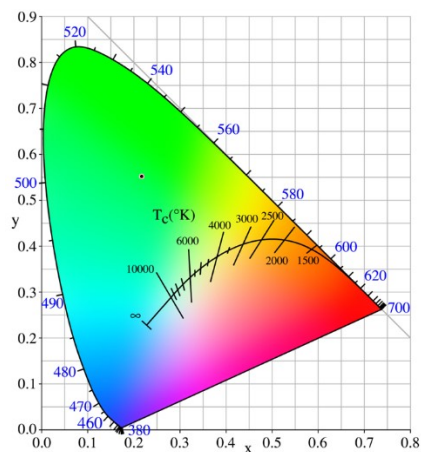

**Fig. S6** CIE chromaticity diagram displaying the color coordinate of JXUST-14.

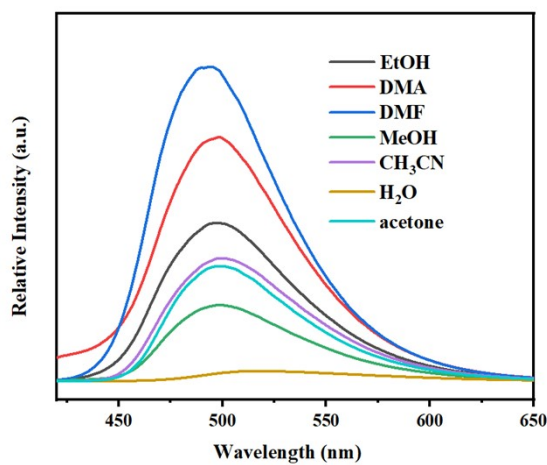

**Fig. S7** The emission spectra of JXUST-14 in some common solvents.

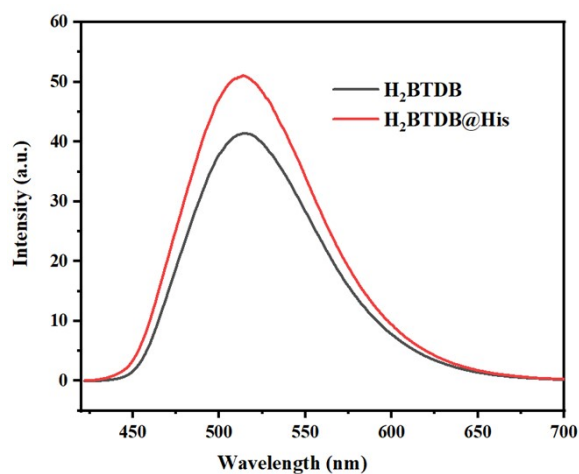

**Fig. S8** The emission spectra of H<sub>2</sub>BTDB ligand and H<sub>2</sub>BTDB@His in EtOH solution.

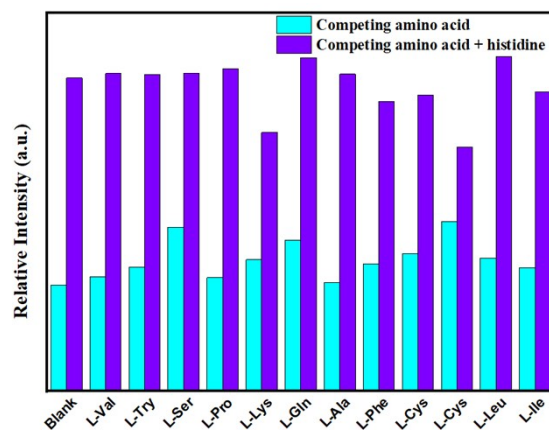

**Fig. S9** Competitive experiments of **JXUST-14** in sensing histidine with the interference of other amino acids in EtOH solutions.

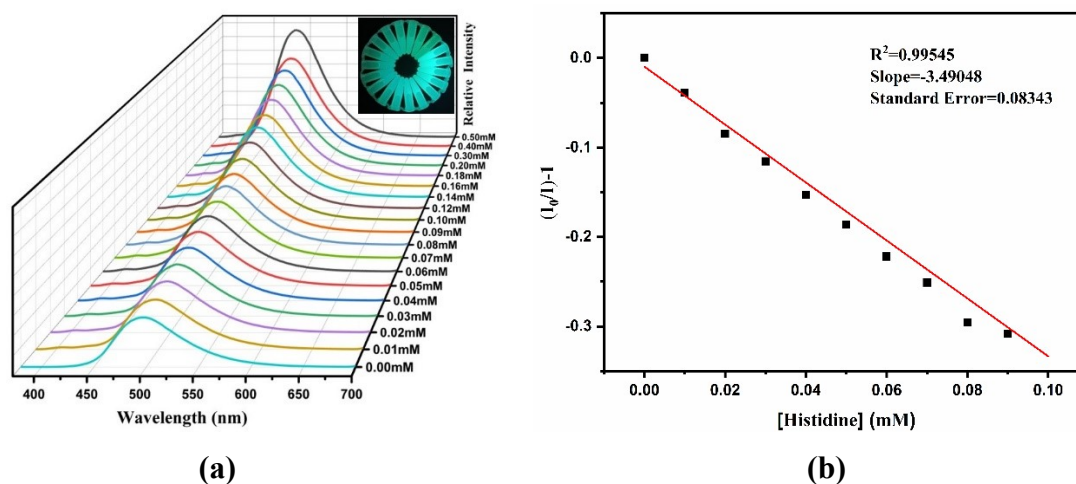

**Fig. S10** (a) Emission spectra of **JXUST-14** dispersed in EtOH suspension with various concentrations of histidine; (b) Linear relationship between fluorescence intensity and histidine concentration in a low concentration.

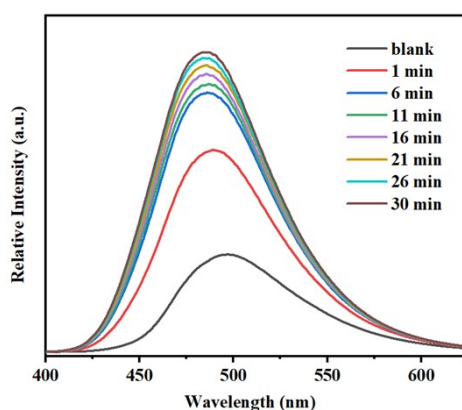

**Fig. S11** Time-dependent emission spectra of **JXUST-14** after adding His.

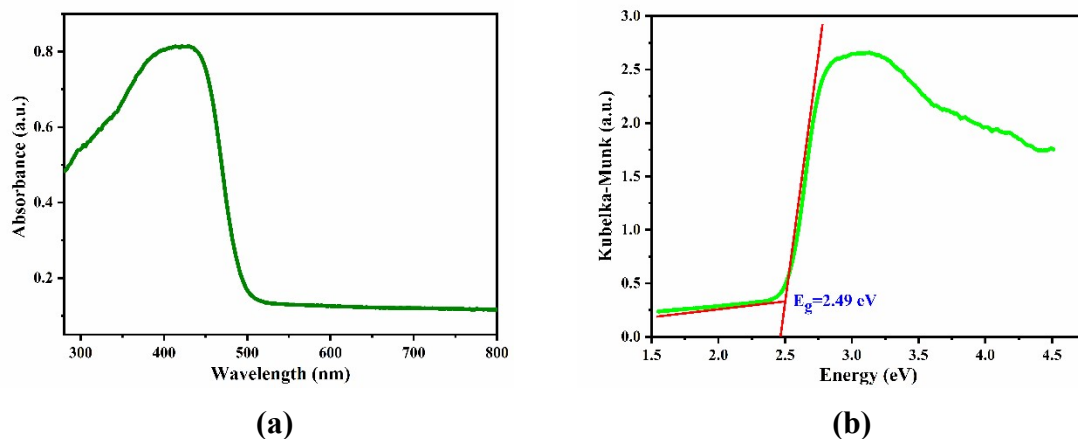

**Fig. S12** (a) UV-vis absorption spectra of JXUST-14; (b) the optical band gap diagram of JXUST-14 calculated from the UV-vis absorption.

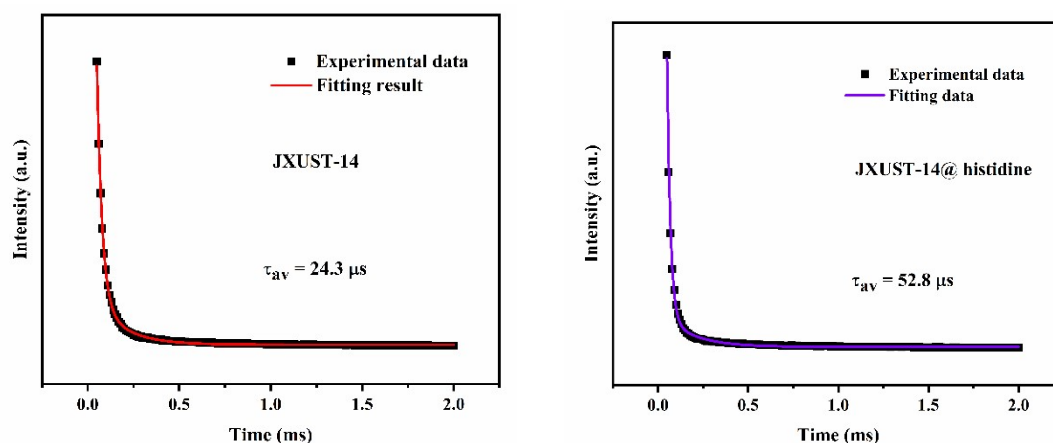

**Fig. S13** The luminescence decay curves of JXUST-14 and JXUST-14@ histidine (1 mg JXUST-14 dispersed in 2 mL DMF solution including 5  $\mu$ L His with the concentration of 0.1 M).

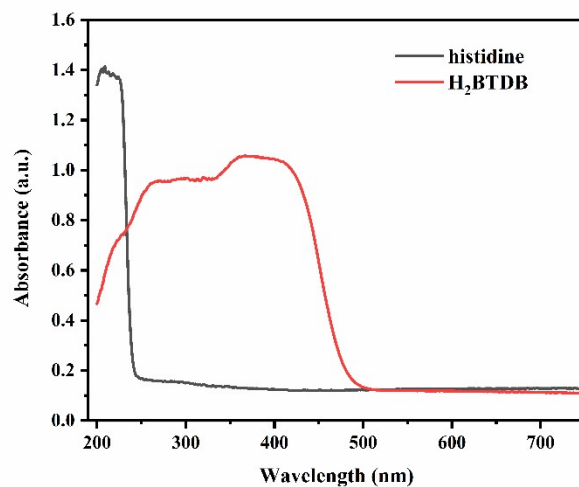

**Fig. S14** The UV-vis absorption spectra of H<sub>2</sub>BTDB ligand and histidine.
